# Supplementary material for: Outcomes of Cardiovascular Magnetic Resonance Imaging in Patients Recently Recovered From Coronavirus Disease 2019 (COVID-19)
Source: PubMed Central journal article supplement (PMC7385689; doi:10.1001/jamacardio.2020.3557), 2020-07-27

## Supplementary Online Content

Puntmann VO, Carerj ML, Wieters I, et al. Outcomes of cardiovascular magnetic resonance imaging in patients recently recovered from coronavirus disease 2019 (COVID-19). *JAMA Cardiol*. Published online July 27, 2020. doi:10.1001/jamacardio.2020.3557

**eFigure.** STROBE diagram

This supplementary material has been provided by the authors to give readers additional information about their work.

**eFigure.** STROBE diagram

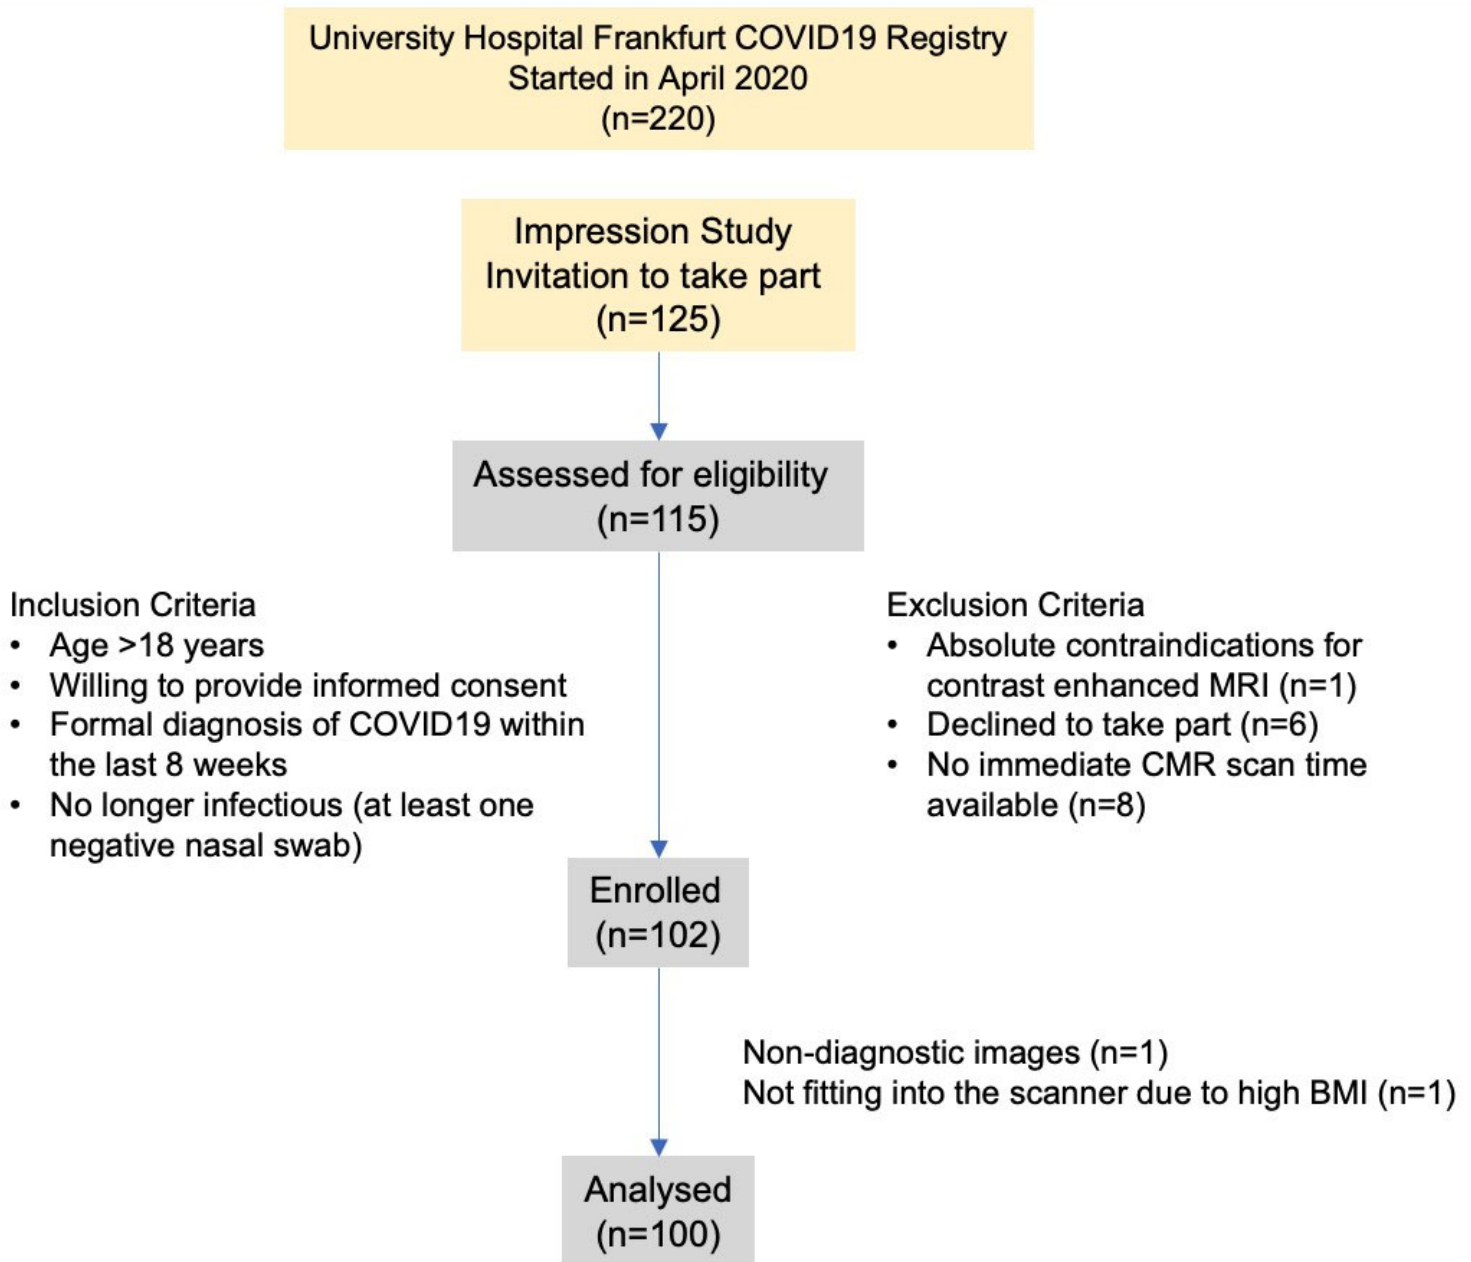

Supplement: jamacardiol-e203557-s001.pdf [file jamacardiol-e203557-s001.pdf]
